# Supplementary material for: An overview of RNA splicing and functioning of splicing factors in land plant chloroplasts
Source: PubMed Central journal article supplement (PMC9275481; doi:10.1080/15476286.2022.2096801), 2022-07-11
Supplement: KRNB_A_2096801_SM4683.pdf [file KRNB_A_2096801_SM4683.pdf]

**Table S1.** Plastid and nuclear-encoded factors involved in the splicing of chloroplast introns.

| Type         | Name      | A.thaliana | O.Sativa                                                                                | Affected introns                                                                                                                              | References                                              |
|--------------|-----------|------------|-----------------------------------------------------------------------------------------|-----------------------------------------------------------------------------------------------------------------------------------------------|---------------------------------------------------------|
| Maturases    | matK      |            |                                                                                         | <i>trnK</i> intron, <i>atpF</i> intron, <i>trnA</i> intron, <i>trnI</i> intron, <i>trnV</i> intron, <i>rpl2</i> intron, <i>rps12</i> intron 2 | Zoschke et al., 2010                                    |
| PPR proteins | AtOTP51   | At2g15820  | Os02g47360                                                                              | <i>ycf3</i> intron 2                                                                                                                          | de Longevialle et al., 2008; Khrouchtchova et al., 2012 |
|              | ZmTHA8    | AT3G27750  | Os04g39970                                                                              | <i>ycf3</i> intron 2; <i>trnA</i> intron                                                                                                      | Khrouchtchova et al., 2012; Ke et al., 2013             |
|              | PpPPR_66  | At2g35130  | Os02g07360                                                                              | <i>ndhA</i> intron                                                                                                                            | Ito et al., 2018                                        |
|              | AtEMB2654 | At2g41720  | Os07g11280                                                                              | <i>rps12</i> intron 1                                                                                                                         | Aryamanesh et al., 2017; Lee et al., 2019               |
|              | ZmPPR4    | At5g04810  | Os04g58780                                                                              | <i>rps12</i> intron 1                                                                                                                         | Schmitz-Linneweber et al., 2006; Lee et al., 2019       |
|              | PpPTSF1   |            |                                                                                         | tRNA <sup>leu</sup> intron                                                                                                                    | Goto et al., 2016                                       |
|              | AtPBF2    | At3g42630  | Os08g40870                                                                              | <i>ycf3</i> intron 1                                                                                                                          | Wang et al., 2020a                                      |
|              | AtSOT5    | At1g30610  | Os01g48380                                                                              | <i>rpl2</i> intron, <i>trnK</i> intron                                                                                                        | Huang et al., 2018                                      |
|              | OsPPR6    |            | Os05g49920                                                                              | <i>ycf3</i> introns                                                                                                                           | Tang et al., 2017                                       |
|              | OsSLC1    | At5g42310  | Os06g0710800                                                                            | <i>rps16</i> intron                                                                                                                           | Lv et al., 2020                                         |
|              | AtEMB1270 | AT3G18110  | Os06g09880                                                                              | <i>ycf3</i> intron 1, <i>clpP</i> intron 2*, <i>ndhA</i> intron                                                                               | Zhang et al., 2021                                      |
|              | AtPDM3    | AT5G39980  | Os01g61630                                                                              | <i>ndhB</i> intron, <i>trnA</i> intron, <i>clpP</i> intron1*                                                                                  | Zhang et al., 2017                                      |
|              | AtPDM4    | At5g27270  | Os06g02120                                                                              | <i>ycf3</i> intron 1 and <i>clpP</i> intron 2*                                                                                                | Chen et al., 2020; Wang et al., 2020b                   |
| AtACM1       | AT3G18110 | Os06g09880 | <i>ndhA</i> intron, <i>ndhB</i> intron, <i>clpP</i> intron 2*, and <i>ycf3</i> intron 1 | Wang et al., 2021a                                                                                                                            |                                                         |

**Table 1.** Continued

| Type         | Name     | A.thaliana | O.Sativa     | Affected introns                                                                                                                               | References                                  |
|--------------|----------|------------|--------------|------------------------------------------------------------------------------------------------------------------------------------------------|---------------------------------------------|
|              | AtECD2   | AT5G50280  | Os05g22870   | <i>ndhA</i> intron, <i>rps12</i> intron 2, <i>ycf3</i> intron 1, and <i>clpP</i> intron 2*                                                     | Wang et al., 2021b                          |
|              | OsWSL4   | At1g09900  | Os02g35750   | <i>rps12</i> intron 2, <i>ndhA</i> intron, <i>atpF</i> intron, <i>rpl2</i> intron                                                              | Wang et al., 2017                           |
|              | OsWSL5   | At5g04810  | Os04g0684500 | <i>rpl2</i> intron, <i>rps12</i> intron 2                                                                                                      | Liu et al., 2018                            |
|              | ZmEMB-7L | At2g41720  | Os07g11280   | <i>rps12</i> intron 1, <i>rpl2</i> intron, <i>atpF</i> intron, <i>ndhA</i> intron                                                              | Yuan et al., 2019                           |
|              | AtOTP70  | At4g25270  | Os03g63560   | <i>rpoC1</i> intron*                                                                                                                           | Chateigner-Boutin et al., 2011              |
|              | OsWSL    | At3G53700  | Os01g37870   | <i>rpl2</i> intron                                                                                                                             | Tan et al., 2014                            |
|              | OsSLA4   | AT5G03800  | Os07g0172600 | <i>petB</i> intron, <i>ndhA</i> intron, <i>atpF</i> intron, <i>rpl2</i> intron, <i>rpl16</i> intron, <i>trnG</i> intron, <i>rps12</i> intron 2 | Wang et al., 2018                           |
|              | OsPGL12  |            | Os12g10184   | <i>ndhA</i> intron                                                                                                                             | Chen et al., 2019                           |
|              | AtPDM1   | At4g18520  | Os03g44210   | <i>ndhA</i> intron, <i>trnK</i> intron                                                                                                         | Zhang et al., 2015                          |
|              | AtAEF1   | AT3G22150  | Os04g51350   | <i>atpF</i> intron                                                                                                                             | Yap et al., 2015                            |
|              | AtHCF152 | At3G09650  | Os12g0102600 | <i>petB</i> intron                                                                                                                             | Meierhoff et al., 2003                      |
|              | ZmPPR5   | At4g39620  | Os02g51480   | <i>trnG</i> intron                                                                                                                             | Williams-Carrier et al., 2008               |
| CRM proteins | ZmCRS1   | At5g16180  | Os08g27150   | <i>atpF</i> intron                                                                                                                             | Till et al., 2001; Ostersetzer et al., 2005 |
|              |          | At4g29750  | Os09g19850   | <i>ndhA</i> intron, <i>petD</i> intron, <i>ndhB</i> intron, <i>ycf3</i> intron 1, <i>trnL</i> intron                                           | Liu et al., 2016                            |
|              |          | At3g18390  | Os05g47850   | unknown                                                                                                                                        |                                             |

**Table 1.** Continued

| Type | Name    | A.thaliana           | O.Sativa     | Affected introns                                                                                                                                                       | References                                       |
|------|---------|----------------------|--------------|------------------------------------------------------------------------------------------------------------------------------------------------------------------------|--------------------------------------------------|
|      | OsAL2   | At4g29750            | Os09g19850   | <i>ndhA</i> intron, <i>petD</i> intron, <i>ndhB</i> intron, <i>ycf3</i> intron 1, <i>trnL</i> intron                                                                   | Liu et al., 2016                                 |
|      | ZmCAF1  | At2g20020            | Os01g31110   | <i>petD</i> intron, <i>trnG</i> intron, <i>rps16</i> intron, <i>rpl16</i> intron, <i>ndhA</i> intron, <i>ycf3</i> intron 1, <i>rpoC1</i> intron*, <i>ClpP</i> intron1* | Asakura and Barkan, 2006; Ostheimer et al., 2003 |
|      | ZmCAF2  | At1g23400            | Os01g21990   | <i>petB</i> intron, <i>ndhB</i> intron, <i>ndhA</i> intron, <i>rps12</i> intron 1, <i>ycf3</i> intron 1                                                                | Ostheimer et al., 2003                           |
|      | AtCFM2  | At3g01370            | Os04g39060   | <i>trnL</i> intron, <i>ndhA</i> intron, <i>ycf3</i> intron 1, <i>clpP</i> intron 2*                                                                                    | Asakura and Barkan, 2007                         |
|      | OsCAF1  | AT2G20020            | Os01g0495900 | <i>atpF</i> intron, <i>rpl2</i> intron, <i>rps12</i> intron, <i>ndhB</i> intron, <i>ndhA</i> intron, <i>ycf3</i> intron                                                | Zhang et al., 2019                               |
|      | OsCAF2  | At1g23400            | Os01g21990   | <i>rpl2</i> intron, <i>rps12</i> intron, <i>atpF</i> intron, <i>ndhA</i> intron, <i>ndhB</i> intron, <i>ycf3</i> intron                                                | Shen et al., 2020                                |
|      | OsCFM2  | AT3G01370            | Os04g0464800 | <i>trnL</i> intron, <i>rps12</i> intron, <i>rpl2</i> intron, <i>ndhA</i> intron, <i>atpF</i> intron, <i>ycf3</i> intron 1                                              | Zhang et al., 2020                               |
|      | AtCFM3a | At3g23070            | Os11g37990   | <i>rps16</i> intron, <i>rpl16</i> intron, <i>ndhB</i> intron, <i>petB</i> intron, <i>petD</i> intron, <i>trnG</i> intron                                               | Asakura et al., 2008                             |
|      | AtCFM3b | At4g14510            |              |                                                                                                                                                                        | Asakura et al., 2008                             |
|      | OsCFM3  | At3g23070; At4g14510 | Os11g37990   | <i>rps16</i> intron, <i>rpl16</i> intron, <i>petD</i> intron, <i>ndhB</i> intron                                                                                       | Asakura et al., 2008                             |
|      | ZmCFM1  | At3G18390            | Os05g47850   | <i>trnA</i> intron, <i>trnI</i> intron, <i>trnV</i> intron                                                                                                             | Feiz et al., 2021                                |

**Table 1.** Continued

| Type                      | Name                   | A.thaliana                           | O.Sativa                 | Affected introns                                                                                                                                                                                                                       | References                                   |
|---------------------------|------------------------|--------------------------------------|--------------------------|----------------------------------------------------------------------------------------------------------------------------------------------------------------------------------------------------------------------------------------|----------------------------------------------|
| peptidyl-tRNA hydrolase   | ZmCRS2                 | At5G38290                            |                          | <i>rps12</i> intron1, <i>ndhB</i> intron, <i>petB</i> intron, <i>ndhA</i> intron, <i>ycf3</i> intron1, <i>rpl16</i> intron, <i>rps16</i> intron, <i>petD</i> intron, <i>trnG</i> intron, <i>clpP</i> intron1* and <i>rpoC1</i> intron* | Jenkins et al., 1997; Jenkins et al., 2001   |
| ribonuclease III proteins | ZmRNC1                 | At4g37510                            | Os01g59510               | <i>rps12</i> intron 2, <i>atpF</i> intron, <i>trnK</i> intron, <i>trnV</i> intron, <i>trnI</i> intron, <i>trnA</i> intron, <i>petB</i> intron, <i>petD</i> intron, <i>ndhB</i> intron, <i>trnG</i> intron                              | Watkins et al., 2007                         |
| DUF860 or PORR            | ZmWTF1                 | At4g01037                            | Os05g49610               | <i>rps12</i> intron 2, <i>atpF</i> intron, <i>trnK</i> intron, <i>trnV</i> intron, <i>trnI</i> intron, <i>trnA</i> intron, <i>petB</i> intron, <i>petD</i> intron, <i>ndhB</i> intron, <i>trnG</i> intron                              | Kroeger et al., 2009                         |
| Whirly protein APO        | ZmWHY1<br>AtAPO1       | At1g14410;<br>At2g02740<br>At1g64810 | Os06g05350<br>Os04g52520 | <i>atpF</i> intron<br><i>ycf3</i> intron 2, <i>petD</i> intron, and <i>clpP</i> intron 1*                                                                                                                                              | Prikryl et al., 2008<br>Watkins et al., 2011 |
| DEAD box RNA helicase     | AtRH3                  | At5g26742                            | Os03g61220               | <i>trnA</i> intron, <i>trnI</i> intron, <i>rpl2</i> intron, <i>rps12</i> intron, <i>trnL</i> intron, <i>trnK</i> intron, <i>atpF</i> intron                                                                                            | Asakura et al., 2012; Gu et al., 2014        |
| mTERF protein             | Zm-mTERF4<br>At-mTERF2 | At4g02990<br>At2g21710               | Os05g33500<br>Os07g04230 | <i>trnI</i> intron, <i>trnA</i> intron, <i>rpl2</i> intron<br><i>ycf3</i> intron 1 and <i>rps12</i> intron 1                                                                                                                           | Hammani and Barkan, 2014<br>Lee et al., 2021 |

Asterisk (\*) represents introns that are found in *Arabidopsis thaliana* but not in maize and rice. Orthologous genes in *Oryza sativa* or in *Arabidopsis thaliana* have been determined using Phytozome 13 (Phytozome BLAST Search ([doe.gov](http://doe.gov))) or NCBI (National Center for Biotechnology Information ([nih.gov](http://nih.gov))).
